# Supplementary material for: Thioxanthone dicarboxamide derivatives as one-component photoinitiators for near-UV and visible LED (365–405 nm) induced photopolymerizations
Source: Royal Society of Chemistry journal article supplement (doi:10.1039/c6ra13512a), 2016-01-01
Supplement: c6ra13512a1.pdf [file c6ra13512a1.pdf]

Supporting information for

# **Thioxanthone Dicarboxamide Derivatives as One-Component Photoinitiators for Near-UV and Visible LED (365-405nm) Induced Photopolymerizations**

Guangxue Chen,<sup>a, ‡</sup> Xiaoyuan Guan,<sup>a, ‡</sup> Ruixin Xu,<sup>c</sup> Junfei Tian,<sup>a</sup> Fachuang Lu,<sup>a</sup> Minghui He <sup>\*a</sup> and Jianwen Yang<sup>b</sup>

<sup>a</sup> State Key Laboratory of Pulp & Paper Engineering, South China University of Technology, Guangzhou 510640, China

<sup>b</sup> DSAPM Lab, School of Materials Science and Engineering, Sun Yat-Sen University, Guangzhou, 510275, China

<sup>c</sup> School of Media and Communication, Shenzhen Polytechnic, Shenzhen, 518055, China

## Content

- 1 <sup>1</sup>H NMR spectra of thioxanthone dicarboxamide derivatives
- 2 FTIR spectra of thioxanthone dicarboxamide derivatives

**1 <sup>1</sup>H NMR spectra of thioxanthone dicarboxamide derivatives**

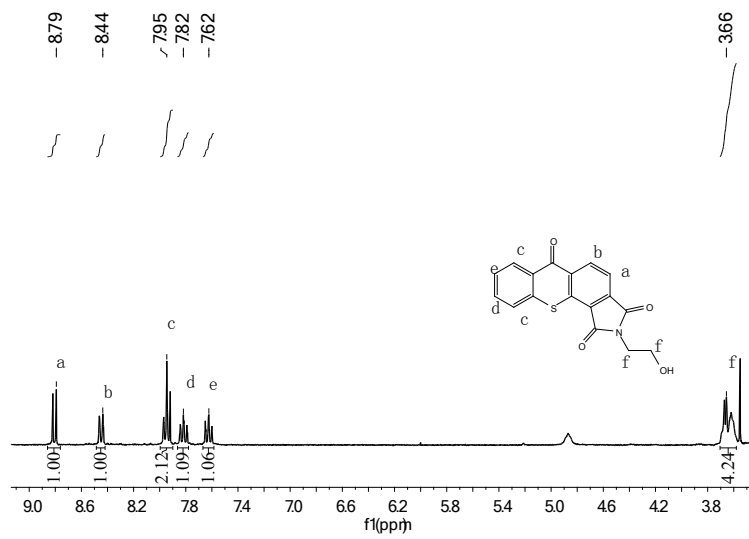

**Figure S1.**  $^1\text{H}$  NMR spectrum of TX-DCA-OH

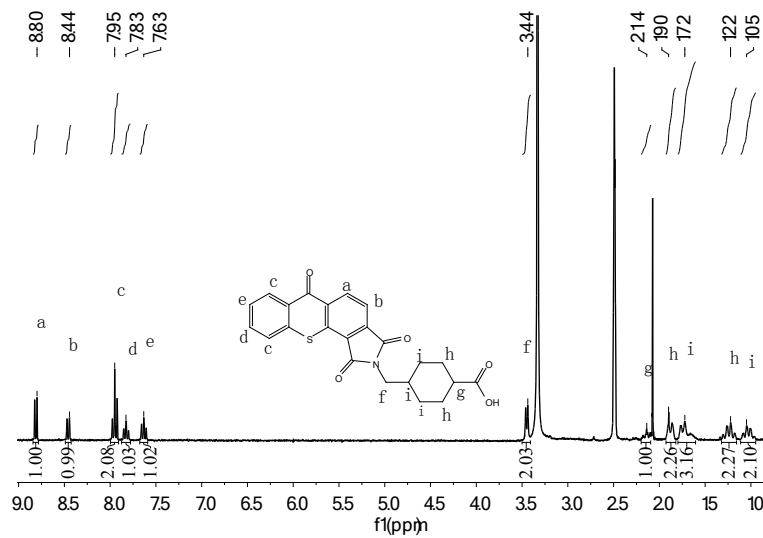

**Figure S2.**  $^1\text{H}$  NMR spectrum of TX-DCA-COOH

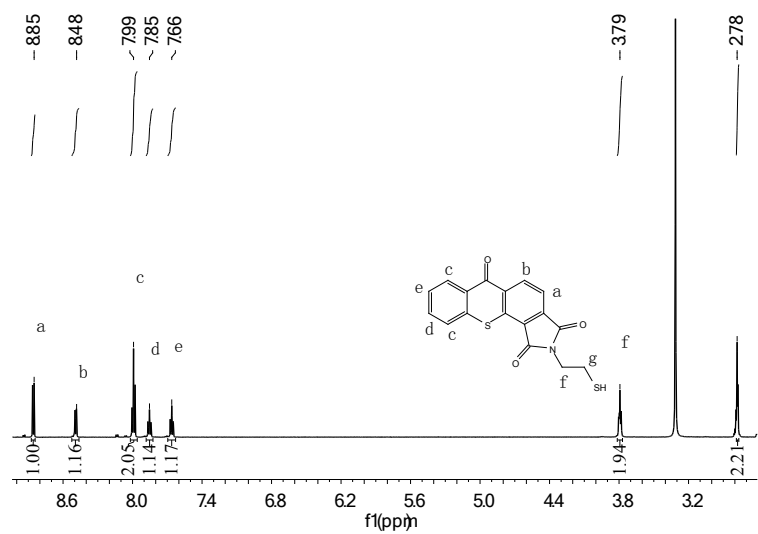

**Figure S3.** <sup>1</sup>H NMR spectrum of TX-DCA-SH

## 2 FTIR spectra of thioxanthone dicarboxamide derivatives

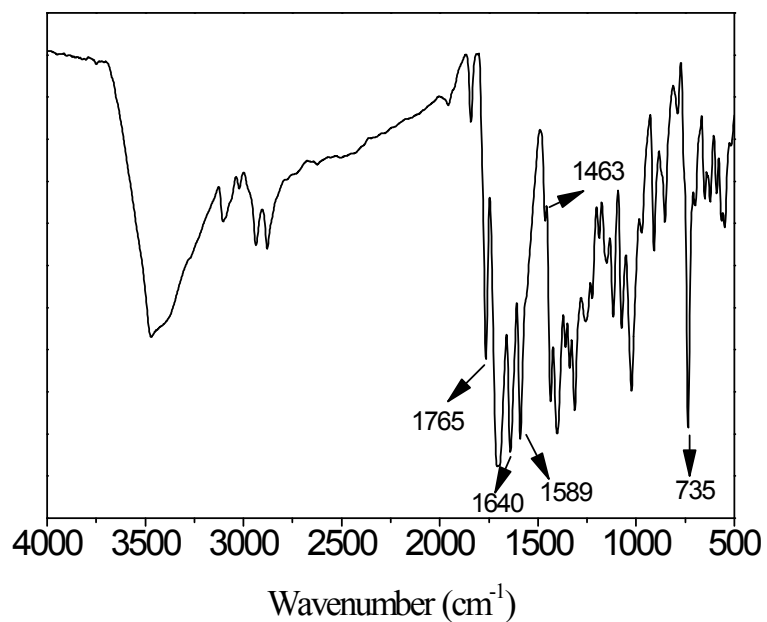

**Figure S4.** FTIR spectrum of TX-DCA-OH

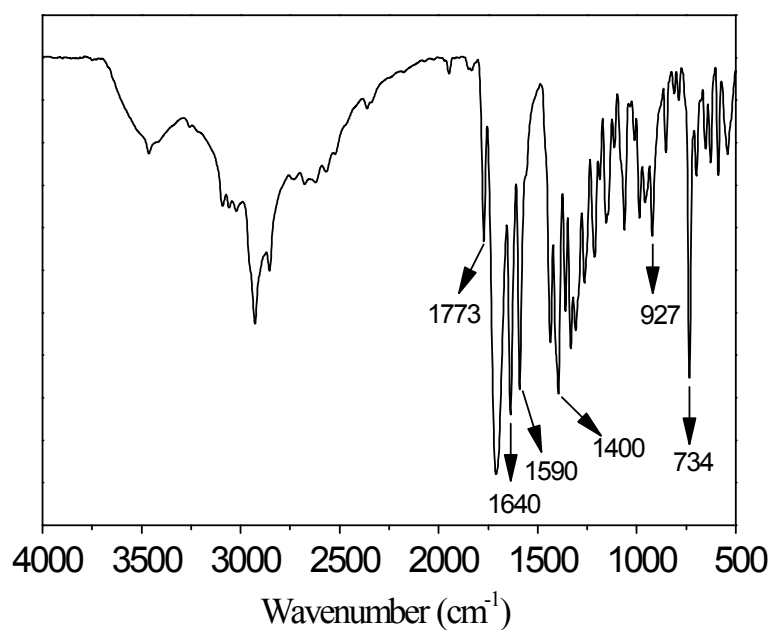

**Figure S5.** FTIR spectrum of TX-DCA-COOH

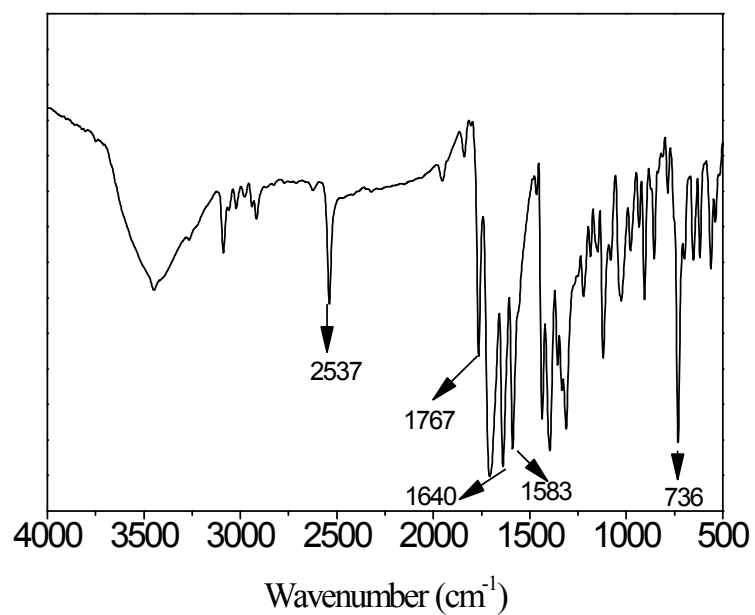

**Figure S6.** FTIR spectrum of TX-DCA-SH
